# Supplementary material for: Combining the Finite Element Method with Structural Connectome-based Analysis for Modeling Neurotrauma: Connectome Neurotrauma Mechanics
Source: PLOS journal article supplement (doi:10.1371/journal.pcbi.1002619), 2012-08-16
Supplement: S6 (10.1371/journal.pcbi.1002619.s006) [file journal.pcbi.1002619.s006]

301 Moved Permanently

# Moved Permanently

The document has moved here.

---

Apache Server at www.ploscompbiol.org Port 80
